# Supplementary material for: Defining the genes for the final steps in biosynthesis of the complex polyketide antibiotic mupirocin by Pseudomonas fluorescens NCIMB10586
Source: PubMed Central journal article supplement (PMC6367315; doi:10.1038/s41598-018-38038-9), 2019-02-07

# Defining the genes for the final steps in biosynthesis of the complex polyketide antibiotic mupirocin by *Pseudomonas fluorescens* NCIMB10586

Jack A. Connolly<sup>[a]</sup>, Amber Wilson<sup>[a]</sup>, Malgorzata Macioszek<sup>[a][c]</sup>, Zhongshu Song<sup>[b]</sup>, Luoyi Wang<sup>[b]</sup>, Hadi H. Mohammad<sup>[a]</sup>, Mukul Yadav<sup>[a]</sup>, Maura di Martino<sup>[a][d]</sup>, Claire E. Miller<sup>[a]</sup>, Jo Hothersall<sup>[a]</sup>, Anthony S. Haines<sup>[a]</sup>, Elton R. Stephens<sup>[a]</sup>, Matthew P. Crump<sup>[b]</sup>, Christine L. Willis<sup>[b]</sup>, Thomas J. Simpson<sup>[b]</sup>, Peter J. Winn<sup>[a]</sup> and Christopher M. Thomas<sup>\*[a]</sup>.

## Supplementary Methods

**Table S1. Bacterial strains used and constructed in this work.**

| Bacterial Strains                                                                                                           | Source/Reference         | Notes                                    |
|-----------------------------------------------------------------------------------------------------------------------------|--------------------------|------------------------------------------|
| <i>Escherichia coli</i> DH5 $\alpha$                                                                                        | ThermoFisher             | Cat#18263-012                            |
| <i>E. coli</i> S17-1 (RP4 <i>tra</i> )                                                                                      | Ref. 31                  | N/A                                      |
| <i>E. coli</i> ER2925 (Dam <sup>-</sup> and Dcm <sup>-</sup> )                                                              | New England Biolabs      | Cat#E4109                                |
| <i>Bacillus subtilis</i> 1604/168                                                                                           | ATCC23857                | Mupirocin sensitive                      |
| <i>Pseudomonas fluorescens</i> SBW25                                                                                        | Ref. 33                  | WT Non-producer                          |
| <i>Pseudomonas fluorescens</i> NCIMB10586                                                                                   | NCIMB ref. 8             | WT mupirocin producer                    |
| <i>P. fluorescens</i> NCIMB10586 $\Delta$ <i>mupI</i> <i>xyIE::mupA</i>                                                     | Ref. 21                  | Reporter <i>xyIE</i> gene in <i>mupA</i> |
| <i>P. fluorescens</i> NCIMB10586 $\Delta$ <i>mupZ</i> - <i>mupI</i>                                                         | Claire Miller, this work | Lacks the <i>mup</i> cluster             |
| <i>P. fluorescens</i> NCIMB10586 $\Delta$ <i>macpA</i>                                                                      | Ref. 18                  | No production                            |
| <i>P. fluorescens</i> NCIMB10586 $\Delta$ <i>macpB</i>                                                                      | Ref. 18                  | No production                            |
| <i>P. fluorescens</i> NCIMB10586 $\Delta$ <i>macpC</i>                                                                      | Ref. 18                  | Produced Mupirocin H and mupiric acid    |
| <i>P. fluorescens</i> NCIMB10586 $\Delta$ <i>macpD</i>                                                                      | Ref. 18                  | No production                            |
| <i>P. fluorescens</i> NCIMB10586 $\Delta$ <i>macpE</i>                                                                      | Ref. 18                  | Produces PA-B                            |
| <i>P. fluorescens</i> NCIMB10586 $\Delta$ <i>mmpA</i>                                                                       | Ref. 17                  | Produces mupiric acid                    |
| <i>P. fluorescens</i> NCIMB10586 $\Delta$ <i>mmpB</i>                                                                       | Jo Hothersall, this work | Produces mupiric acid                    |
| <i>P. fluorescens</i> NCIMB10586 <i>mmpE</i> $\Delta$ OR                                                                    | Ref. 17                  | Produces PA-C                            |
| <i>P. fluorescens</i> NCIMB10586 $\Delta$ <i>mupA</i>                                                                       | Jo Hothersall, this work | Produces mupiric acid                    |
| <i>P. fluorescens</i> NCIMB10586 $\Delta$ <i>mupB</i>                                                                       | Jo Hothersall, this work | No PA-A production                       |
| <i>P. fluorescens</i> NCIMB10586 $\Delta$ <i>mupC</i>                                                                       | Ref. 18                  | Produces Mupirocin C                     |
| <i>P. fluorescens</i> NCIMB10586 $\Delta$ <i>mupD</i>                                                                       | Ref. 18                  | No PA-A production                       |
| <i>P. fluorescens</i> NCIMB10586 $\Delta$ <i>mupE</i>                                                                       | Ref. 18                  | No PA-A production                       |
| <i>P. fluorescens</i> NCIMB10586 $\Delta$ <i>mupF</i>                                                                       | Ref. 18                  | Produces Mupirocin F                     |
| <i>P. fluorescens</i> NCIMB10586 $\Delta$ <i>mupG</i>                                                                       | Ref. 18                  | Produces Mupirocin H                     |
| <i>P. fluorescens</i> NCIMB10586 $\Delta$ <i>mupH</i>                                                                       | Ref. 18                  | Produces Mupirocin H                     |
| <i>P. fluorescens</i> NCIMB10586 $\Delta$ <i>mupI</i>                                                                       | Ref. 21                  | No production                            |
| <i>P. fluorescens</i> NCIMB10586 $\Delta$ <i>mupJ</i>                                                                       | Ref. 18                  | Produces Mupirocin H                     |
| <i>P. fluorescens</i> NCIMB10586 $\Delta$ <i>mupK</i>                                                                       | Ref. 18                  | Produces Mupirocin H                     |
| <i>P. fluorescens</i> NCIMB10586 $\Delta$ <i>mupL</i>                                                                       | Ref. 18                  | No production                            |
| <i>P. fluorescens</i> NCIMB10586 $\Delta$ <i>mupM</i>                                                                       | Ref. 18                  | No production                            |
| <i>P. fluorescens</i> NCIMB10586 $\Delta$ <i>mupN</i>                                                                       | Ref. 18                  | No production                            |
| <i>P. fluorescens</i> NCIMB10586 $\Delta$ <i>mupO</i>                                                                       | Ref. 15                  | Produces PA-B                            |
| <i>P. fluorescens</i> NCIMB10586 $\Delta$ <i>mupP</i>                                                                       | Ref. 18                  | Produces Mupirocin P                     |
| <i>P. fluorescens</i> NCIMB10586 $\Delta$ <i>mupR</i>                                                                       | Ref. 21                  | No production                            |
| <i>P. fluorescens</i> NCIMB10586 $\Delta$ <i>mupQ</i> , $\Delta$ <i>mupS</i> , $\Delta$ <i>macpD</i> , $\Delta$ <i>mmpF</i> | Mukul Yadav, this work   | Produces Mupirocin H and mupiric acid    |
| <i>P. fluorescens</i> NCIMB10586 $\Delta$ <i>mupU</i>                                                                       | Ref. 15                  | Produces PA-B                            |

|                                                             |                          |                         |
|-------------------------------------------------------------|--------------------------|-------------------------|
| <i>P. fluorescens</i> NCIMB10586 $\Delta mupW$              | Ref. 15                  | Produces Mupirocin W    |
| <i>P. fluorescens</i> NCIMB10586 $\Delta mupW, \Delta mupT$ | Jo Hothersall, this work | Produces Mupirocin W    |
| <i>P. fluorescens</i> NCIMB10586 $\Delta mupX$              | Ref. 15                  | Reduced PA-A production |
| <i>P. fluorescens</i> NCIMB10586 <i>mupV</i> Y167F          | Jack Connolly, this work | Produces PA-B           |
| <i>P. fluorescens</i> NCIMB10586 <i>mupV</i> V581A H631A    | Jack Connolly, this work | Produces PA-B           |
| <i>P. fluorescens</i> NCIMB10586 <i>mupZ</i> C25X (TERM)    | Hadi Mohammed, this work | No PA-A production      |

**Table S2. Plasmids used and constructed in this work.**

| Plasmid     | Source/Reference         | Notes                                                                                                |
|-------------|--------------------------|------------------------------------------------------------------------------------------------------|
| pAKE604     | Ref. 21                  | Km <sup>R</sup> Ap <sup>R</sup> pMB1 replicon, <i>ori</i> <sub>TRK2</sub>                            |
| pJC70       | Jack Connolly, this work | Km <sup>R</sup> Ap <sup>S</sup> derivative of pAKE604                                                |
| pGEM-T Easy | Promega Cat#A1360        | Ap <sup>R</sup> pMB1 replicon linear T-tailed vector                                                 |
| pJH2        | Ref. 18                  | pJH10 expressing <i>mupR</i>                                                                         |
| pJH10       | Ref. 9                   | Tc <sup>R</sup> IncQ vector with <i>tacp lacI<sup>q</sup></i> expression                             |
| pAW1        | This work                | pJC70 derivative for <i>mupV</i> domain 1 Y167F mutagenesis                                          |
| pJC102      | This work                | pJC70 derivative for <i>mupV</i> domain 2 V581A, H631A mutagenesis                                   |
| pHHMZC25    | This work                | pAKE604 derivative for <i>mupZ</i> mutagenesis                                                       |
| pMY21       | This work                | pAKE604 derivative to delete <i>mupQ mupS macpD mmpF</i>                                             |
| pSCΔT       | Ref. 15                  | pAKE604 derivative to delete <i>mupT</i>                                                             |
| pMMG1       | This work                | pGEM-T derivative with <i>mupO</i>                                                                   |
| pMMG2       | This work                | pGEM-T derivative with <i>macpE</i>                                                                  |
| pMMG12      | This work                | pGEM-T derivative with <i>mupO, macpE</i>                                                            |
| pMMG34      | This work                | pGEM-T derivative with <i>mupU, mupV</i>                                                             |
| pMMG1234    | This work                | pGEM-T derivative with <i>mupO, macpE, mupU, mupV</i>                                                |
| pMMG5       | This work                | pGEM-T derivative with <i>mupC</i>                                                                   |
| pMMG6       | This work                | pGEM-T derivative with <i>mupF</i>                                                                   |
| pMMG56      | This work                | pGEM-T derivative with <i>mupC, mupF</i>                                                             |
| pMMG66      | This work                | pGEM-T derivative with <i>mupO, macpE, mupU, mupV, mupC, mupF</i>                                    |
| pMMH6       | This work                | pJH10 derivative expressing <i>mupO, macpE, mupU, mupV, mupC, mupF</i>                               |
| pJC124      | This work                | pJH10 derivative expressing <i>mupO, mupP, macpE, mupU, mupV, mupC, mupF</i>                         |
| pJC132      | This work                | pJH10 derivative expressing <i>mupO, mupP, macpE, mupU, mupV, mupC, mupF, mupM, mupN</i>             |
| pJC133      | This work                | pJH10 derivative expressing <i>mupO, mupP, macpE, mupU, mupV, mupC, mupF, mupL, mupM, mupN</i>       |
| pJC134      | This work                | pJH10 derivative expressing <i>mupO, mupP, macpE, mupU, mupV, mupC, mupF, mupL-H256A, mupM, mupN</i> |

**Table S3. Oligonucleotides used in this work.**

| Oligonucleotides: Name and sequence                             | Source    | Purpose                                      |
|-----------------------------------------------------------------|-----------|----------------------------------------------|
| AW1 AGACAATTGAGCAGGCCCGTCATTTAC                                 | This work | <i>mupV</i> mutagenesis, pAW1                |
| AW2 TGGTTTCTTCGAAATAGTTATTGAATTCAGTGC                           | This work | <i>mupV</i> mutagenesis, pAW1                |
| AW3 CAATAACTATTTTCGAAGAAACCAATGTGCG                             | This work | <i>mupV</i> mutagenesis, pAW1                |
| AW4 AGAGGATCCGTTGTGGATGTAGGGGTTGTAAAAC                          | This work | <i>mupV</i> mutagenesis, pAW1                |
| JC1 GGAATCGTCGACAAAGCACATCTGATCGGCT                             | This work | <i>mupV</i> mutagenesis, pJC102              |
| JC2 CAAACCAAATGCATCCATGCCAGCGATTTTC                             | This work | <i>mupV</i> mutagenesis, pJC102              |
| JC3 GGCATGGATGCATTTGGTTTGTATAACCACCTGG                          | This work | <i>mupV</i> mutagenesis, pJC102              |
| JC4 GCACTGGAATTCTGACGACAACGTTGTAGTAGGC                          | This work | <i>mupV</i> mutagenesis, pJC102              |
| QDA1F GGTGAATTCGAAGATCTGGAGGACGCCGT                             | This work | Deletion of <i>mupS,Q macpD, mmpF</i>        |
| QDA1R TGGTCTAGAGTCGCTGATCCAATTACGTTCCCTC                        | This work | Deletion of <i>mupS,Q macpD, mmpF</i>        |
| QDA2F GGTTCTAGAGACGTTGTGCAGGCCGGAATC                            | This work | Deletion of <i>mupS,Q macpD, mmpF</i>        |
| QDA2R TGGGGATCCGCTCACGTTGGGGCAACCAC                             | This work | Deletion of <i>mupS,Q macpD, mmpF</i>        |
| HHMZ1F TCAGGATCCGAGAGCATCTGCCTTACAAGC                           | This work | <i>mupZ</i> mutagenesis, pHMZC25             |
| HHMZ1R GATAAACACGGCTCAATACGC                                    | This work | <i>mupZ</i> mutagenesis, pHMZC25             |
| HHMZ2F GCGTATTGAGCCGTGTTTATC                                    | This work | <i>mupZ</i> mutagenesis, pHMZC25             |
| HHMZ2R GAGTCTAGAGAGTGACGCCGCCATTAC                              | This work | <i>mupZ</i> mutagenesis, pHMZC25             |
| FΔ <i>bla</i> TCCGAGCTCCAGTTTCGATGTAACCCACTC                    | This work | Deletion of <i>bla</i> from pAKE604          |
| RΔ <i>bla</i> GAAGAGCTCAGGCAACTATGGATGAACG                      | This work | Deletion of <i>bla</i> from pAKE604          |
| F <i>mupO</i><br>GGTACCGGAGAGCAACGATGACATCGTGGGAAAGAGA          | This work | <i>mupO</i> amplification                    |
| R <i>mupO</i> ACCGGTTACCGGGCGATTCCGTGG                          | This work | <i>mupO</i> amplification                    |
| F <i>macpE</i> ACCGGTCACAGGAGGCGTAGATGC                         | This work | <i>macpE</i> amplification                   |
| R <i>macpE</i><br>ACTAGTTCTAGACTTAAGTCACTGCTCACGTTGGGC          | This work | <i>macpE</i> amplification                   |
| F <i>mupUV</i> CTTAAGGGCAAGGGAATGTGAGATG                        | This work | <i>mupUV</i> amplification                   |
| R <i>mupUV</i><br>ACTAGTTCTAGAAAGCTTTTATGCATCCGCCTGGGA          | This work | <i>mupUV</i> amplification                   |
| F <i>mupC</i> AAGCTTCGGAACGAGGCCGCCACC                          | This work | <i>mupC</i> amplification                    |
| R <i>mupC</i> CCTAGGGGATCCTCAGCGCTTATAGGTTGAGCA                 | This work | <i>mupC</i> amplification                    |
| F <i>mupF</i> CCTAGGCCCAAGGATCGCTACCGA                          | This work | <i>mupF</i> amplification                    |
| R <i>mupF</i> ACTAGTTCTAGATCAGGGTGTGTGCGGGGA                    | This work | <i>mupF</i> amplification                    |
| F <i>mupOP</i><br>GAACGGTACCTACTAGTGGGAGAGCAACGATGACATC         | This work | <i>mupOP</i> amplification                   |
| R <i>mupOP</i> GCCTCCTGTGGTGTGCTCCTGTTGCTGTTTG                  | This work | <i>mupOP</i> amplification                   |
| F <i>macpE2</i><br>ACAGGAGCACACCACAGGAGGCGTAGATGC               | This work | <i>macpE</i> amplification                   |
| R <i>macpE2</i><br>AGACTTAAGTCACTGCTCACGTTGGGC                  | This work | <i>macpE</i> amplification                   |
| F <i>mupLMN</i><br>CCACTCTAGACAGTGAAGAGAGGGACACACAGC            | This work | <i>mupLMN</i> amplification                  |
| R <i>mup(L)MN</i><br>GGTCTCAGGCCCGGATCCAAACCTATAAGCACTG         | This work | <i>mupLMN</i> and <i>mupMN</i> amplification |
| F <i>mupMN</i><br>TAGCTCTAGACTGACAGGTGTGACTGATGAGTACG           | This work | <i>mupMN</i> amplification                   |
| F <i>mupL</i> -H256A<br>GATTGGGGGGCCTACACGCTTTTCTCTGATACACAAGAG | This work | Mutation of <i>mupL</i>                      |
| R <i>mupL</i> -H256A<br>AGCGTGTAGGCCCCCAATCGTCCATGATG           | This work | Mutation of <i>mupL</i>                      |

## Construction of plasmids created during this work

### Construction of mutagenesis plasmids

All plasmid constructs reported in this paper were checked by suitable restriction digests and Sanger sequencing of inserted DNA.

#### **pAW1 – *mupV* domain 1 Y167F**

Primer pairs AW1 plus AW2 and AW3 plus AW4 were used to amplify 555 bp and 502 bp segments of the NCIMB10586 chromosome, respectively. Primers AW2 and AW3 were designed to generate a 23 bp overlap, which included the *mupV* Y167F mutation (DNA codon TAC to TTC). The products were spliced by overlap PCR using primers AW1 and AW4, and cloned using MfeI/BamHI digestion and ligation with pAKE604 digested with EcoRI/BamHI to yield mutagenesis vector pAW1.

#### **pHHMZC25 – *mupZ* C25X (TERM)**

Primers HHMZ1F plus HHMZ1R and HHMZ2F plus HHMZ2R were used to amplify 546 bp and 582 bp fragments from the NCIMB10586 chromosome. Primers HHMZ1R and HHMZ2F were designed to generate a 21 bp overlap which contained the base to be mutated from C to A, generating a TGA stop codon. The products were spliced by overlap PCR using primers HHMZ1F and HHMZ2R, and cloned using BamHI/XbaI digestion and ligation with pAKE604 digested with EcoRI/BamHI to yield mutagenesis vector pHHMXC25.

#### **pJC70 – derivative of suicide plasmid pAKE604 lacking the *bla* gene that confers Ap<sup>R</sup>**

To allow easy selection of transconjugants after transfer of suicide mutagenesis plasmids from *E. coli* to *P. fluorescens* (which is naturally Ap<sup>R</sup>) the *bla* gene was deleted. Primers FΔ*bla* and RΔ*bla* were used to amplify the 6574 bp segment of pAKE604 that excludes the *bla* gene, recircularised by ligation after cutting with SacI and introduced into *E. coli* DH5 selecting Km<sup>R</sup>. A correct clone not conferring Ap<sup>R</sup> was designated pJC70.

#### **pJC102 – *mupV* domain 2 V581A, H631A**

Primer pairs JC1 plus JC2 and JC3 plus JC4 were used to amplify 546 bp and 500 bp segments of the NCIMB10586 chromosome, respectively. Primers JC2 and JC3 were designed to generate a 21 bp overlap, which included the *mupV* H631A mutation (DNA codon CAT to GCA). The products were spliced by overlap PCR using primers JC1 and JC4, and then A-tailed and ligated into pGEM-T Easy (Promega). Sequencing revealed a secondary, unintended point mutation (V581A), which was deemed acceptable as it was also in domain 2 of *mupV*. The DNA fragment was cloned using Sall/EcoRI digestion and ligation into pJC70 to yield mutagenesis vector pJC102.

#### **pMY21 – deletion of *mupQ* *mupS* *macpD* and *mmpF***

Primers QDA1F plus QDA1R and QDA2F plus QDA2R were used to amplify 547 bp and 504 bp fragments from the NCIMB10586 chromosome. Primers QDA1R and QDA2F were designed to incorporate an XbaI site allowing the two arms to be joined to an in-frame deletion starting in *mupQ* and ending in *mmpF* and cloned using EcoRI/BamHI digestion and ligation with pAKE604 digested with EcoRI/BamHI to yield mutagenesis vector pMY21.

### Construction of expression plasmids

Initial constructions were designed when we predicted *mupO*, *macpE*, *mupU*, *mupV*, *mupC* and *mupF* to be sufficient for the PAB to PAA conversion. A series of intermediate plasmids were constructed using AT-cloning by the protocol in the pGEM-T Easy manual prior to generation of combinations of genes and then cloning into the broad host-range expression vector pJH10. Primers were designed to include the native NCIMB10586 ribosome binding site (RBS) for each gene. The template DNA for all initial PCRs was the *P. fluorescens* NCIMB10586 chromosome.

#### **pMMG1 – intermediate carrying *mupO***

Primers FmupO and RmupO were used to amplify a 1.4 kb fragment, which was AT-cloned into pGEM-T Easy.

#### **pMMG2 – intermediate carrying *macpE***

Primers FmacpE and RmacpE were used to amplify a 257 bp fragment, which was AT-cloned into pGEM-T Easy.

**pMMG12 – intermediate carrying *mupO* and *macpE***

A 269 bp *macpE*-containing fragment was released by *AgeI/XbaI* digest of pMMG2, and cloned into pMMG1 digested *AgeI/XbaI*.

**pMMG34 – intermediate carrying *mupU* and *mupV***

Primers FmupUV and RmupUV were used to amplify a 3.6 kb fragment encoding both *mupU* and *mupV*, which was AT-cloned into pGEM-T Easy.

**pMMG1234 – intermediate carrying *mupO*, *macpE*, *mupU* and *mupV***

The 3.6 kb *mupU* - *mupV* fragment from pMMG34 was released by *AflI/XbaI* digestion and cloned into *AflI/XbaI*-cut pMMG12.

**pMMG5 – intermediate carrying *mupC***

Primers FmupC and RmupC were used to amplify a 1.3 kb fragment, which was AT-cloned into pGEM-T Easy.

**pMMG6 – intermediate carrying *mupF***

Primers FmupF and RmupF were used to amplify a 1.0 kb fragment, which was AT-cloned into pGEM-T Easy.

**pMMG56 – intermediate carrying *mupC* and *mupF***

The 1.0 kb *mupF* fragment from pMMG6 was released by *AvrII/Spel* digestion and cloned into *AvrII/Spel*-cut pMMG5.

**pMMG66 – intermediate carrying *mupO*, *macpE*, *mupU*, *mupV*, *mupC* and *mupF***

The 2.4 kb *mupC* - *mupF* fragment from pMMG56 was released by *HindIII/XbaI* digestion and cloned into *HindIII/XbaI*-cut pMMG1234.

**pMMH6 – expression plasmid carrying *mupO*, *macpE*, *mupU*, *mupV*, *mupC* and *mupF***

The 7.6 kb fragment from pMMG66 containing all six genes was released by *KpnI/XbaI* digestion and cloned into broad host-range expression vector pJH10 cut with *KpnI/XbaI*.

**pJC124 – expression plasmid carrying *mupO*, *mupP*, *macpE*, *mupU*, *mupV*, *mupC* and *mupF***

Primers FmupOP and RmupOP were used to amplify a 2.4 kb fragment including genes *mupO* and *mupP*. Primers FmacpE2 and RmacpE2 were used to amplify a 278 bp fragment carrying *macpE*. Primers RmupOP and FmacpE2 were designed to overlap. The products were spliced by overlap PCR with primers FmupOP and RmacpE2, to give a 2.6 kb fragment that was digested with *KpnI/AflI* and inserted into pMMH6 to replace the *mupO-macpE* segment, yielding pJC124.

**pJC132 – expression plasmid carrying *mupO*, *mupP*, *macpE*, *mupU*, *mupV*, *mupC*, *mupF*, *mupM* and *mupN***

Primers FmupMN and RmupMN were used to amplify a 4.1 kb fragment including genes *mupM* and *mupN*. This product was AT-cloned to pGEM-T Easy. The DNA insert was released by *XbaI/BsaI* digest, and inserted into *XbaI/NotI*-digested pJC124 yielding pJC132.

**pJC133 – expression plasmid carrying *mupO*, *mupP*, *macpE*, *mupU*, *mupV*, *mupC*, *mupF*, *mupL*, *mupM* and *mupN***

Primers FmupLMN and RmupMN were used to amplify a 5.1 kb fragment including genes *mupL*, *mupM* and *mupN*. This product was AT-cloned to pGEM-T Easy. The DNA insert was released by *XbaI/BsaI* digest and inserted into *XbaI/NotI*-digested pJC124 yielding pJC133.

**pJC134 – expression plasmid pJC133 with point mutation H256A in *MupL***

Primers FmupLMN and RmupL-H256A were used to amplify an 809 bp N-terminal segment of *mupL* while primers FmupL-H256A and RmupMN were used to amplify a 4.3 kb fragment with the C-terminal part part of *mupL* plus *mupM* and *mupN*. The overlap in primers FmupL-H256A and RmupL-H256A included the *mupL* H256A mutation (DNA codon CAC to GCC) allowing overlap PCR using outer primers FmupLMN and RmupMN, to generate a 5.1 kb fragment including *mupLH256A*, *mupM*

and *mupN*. This product was AT-cloned into pGEM-T Easy and then released by *XbaI/BsaI* digest before insertion into *XbaI/NotI*-digested pJC124 yielding pJC134.

## Supporting Information

Figure S1. Genetic map of the mupirocin cluster

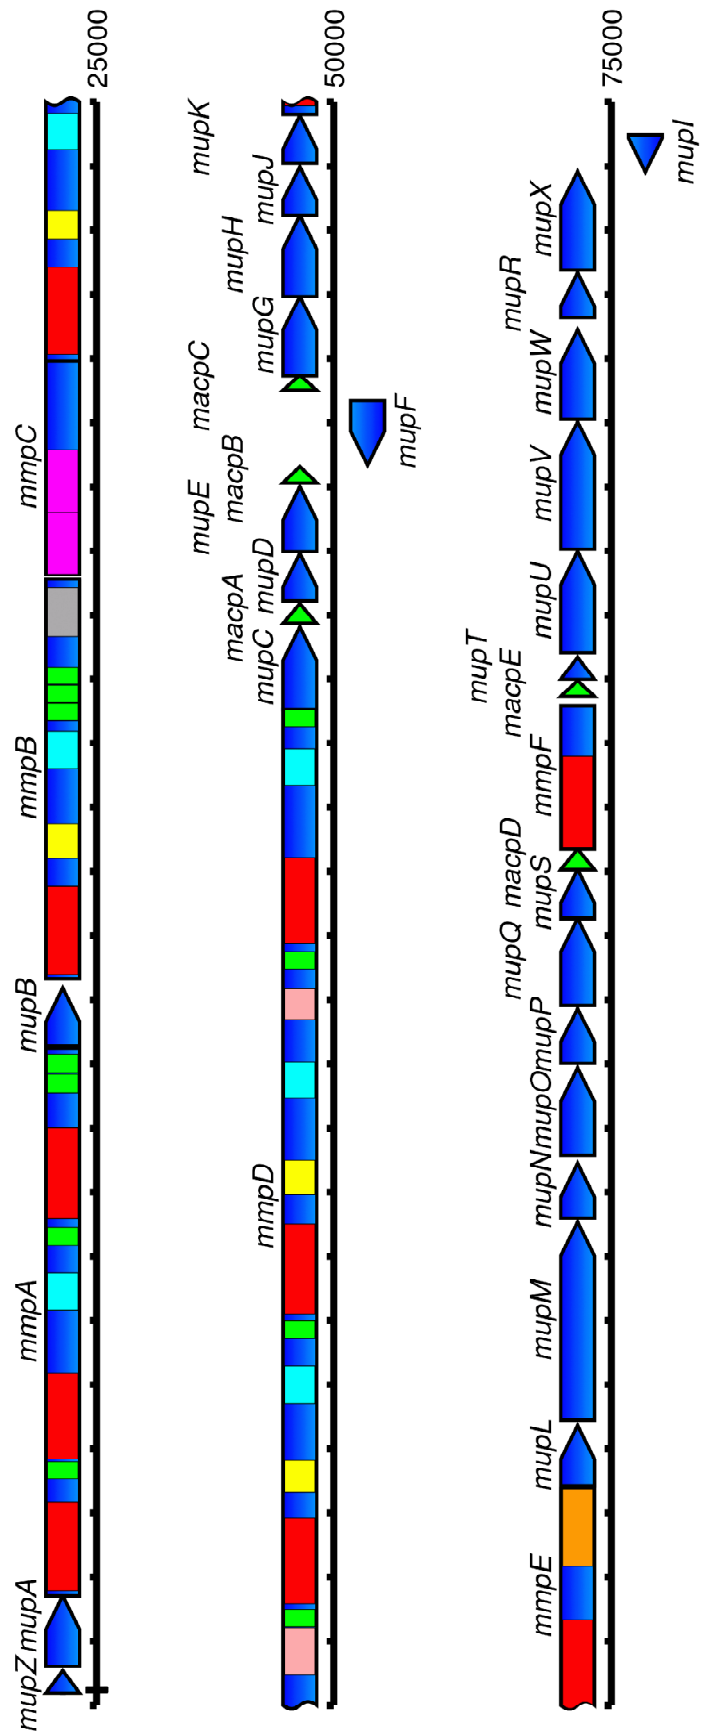



Figure S2. XylE assay: the crude PA-B extract contains the homoserine lactone product of MupI, and activates the *mupA* promoter in 10586  $\Delta mupI$  *xylE::mupA*. XylE catalyses conversion of catechol to the yellow compound 2-hydroxymuconic semialdehyde. Representative plate shown, n=9.

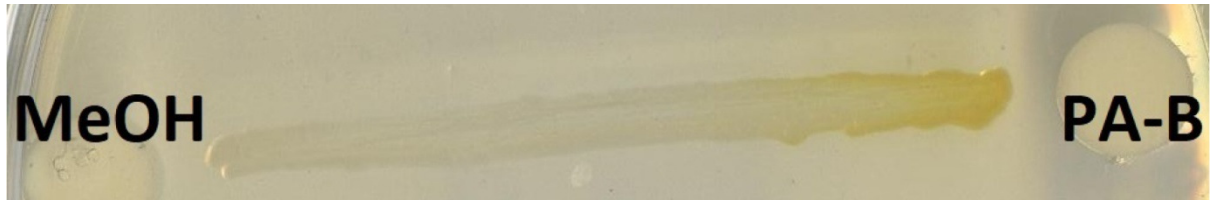



Figure S4. Bioassay activity of 10586 *mupV* point mutants vs *Bacillus subtilis*, n=2.

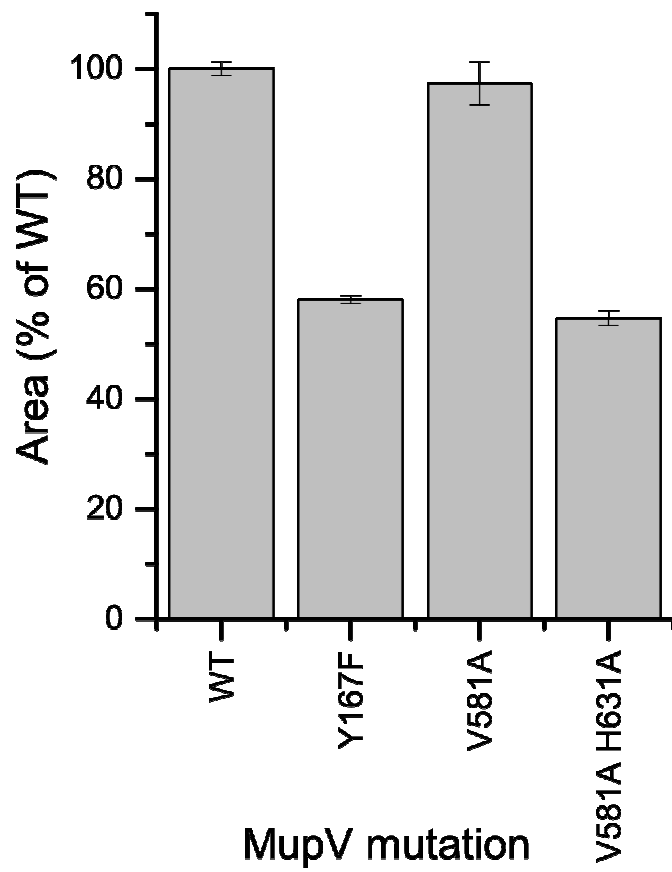

Figure S5. HPLC of 10586 *mupV* point mutants, n=3, metabolite mass confirmed by LC-MS.

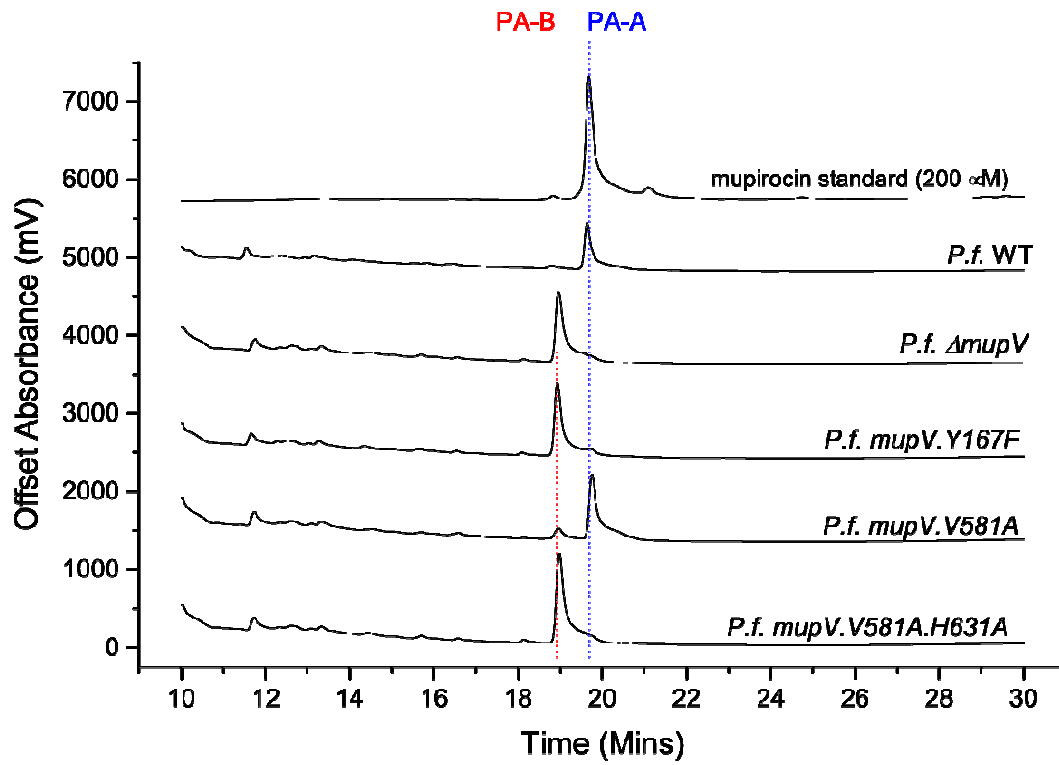

Figure S6. A, LCMS and B, <sup>1</sup>H-NMR of 10586 *mupV* point mutants showing that point mutations in MupV domain 1 and domain 2 produce PA-B just like a  $\Delta mupV$  mutant.

S6A.

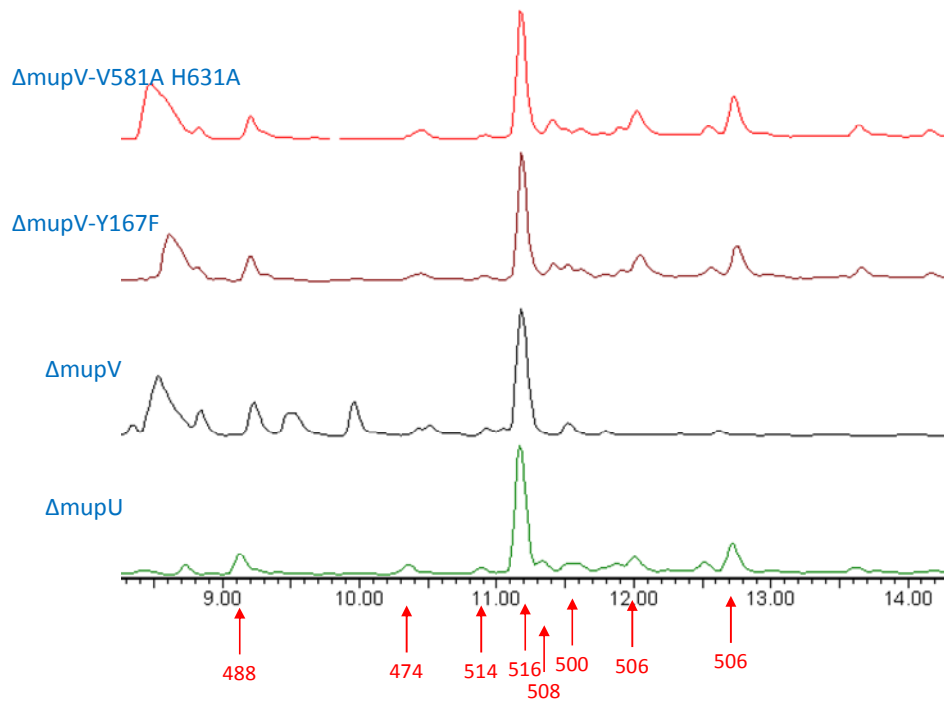



Figure S7. HPLC: testing for complementation of 10586  $\Delta mupL$ , 10586  $\Delta mupM$  and 10586  $\Delta mupN$  by pJC132 and pJC133.

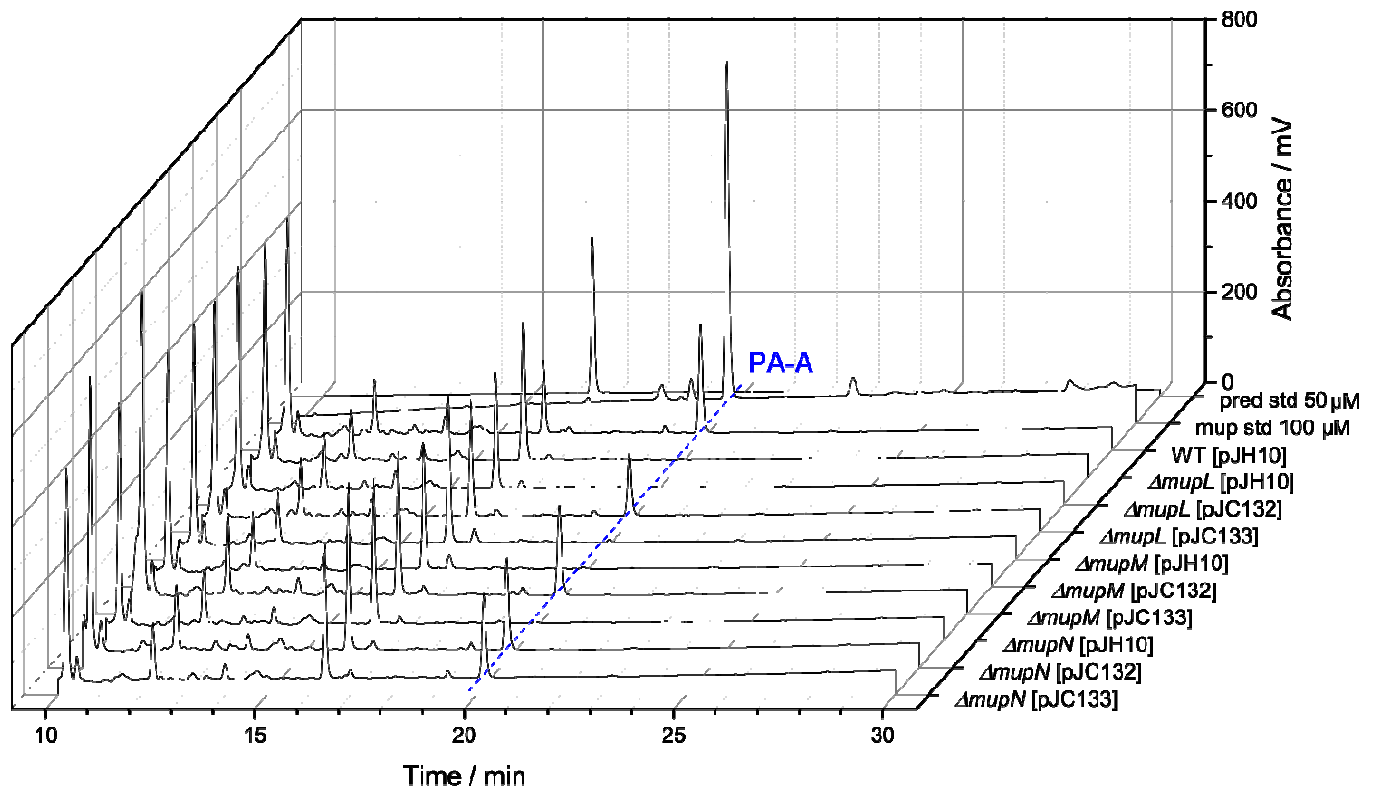

Supplement: 41598_2018_38038_MOESM1_ESM.pdf [file 41598_2018_38038_MOESM1_ESM.pdf]
